# Supplementary material for: The Effects of Saline Water Drip Irrigation on Tomato Yield, Quality, and Blossom-End Rot Incidence --- A 3a Case Study in the South of China
Source: PLoS One. 2015 Nov 5;10(11):e0142204. doi: 10.1371/journal.pone.0142204 (PMC4634986; doi:10.1371/journal.pone.0142204)
Supplement: S3 Table — (DOC) [file pone.0142204.s007.doc]

| Year | Salinity  (dS/m) | Soil matric potential (-kPa) | | | | | |
| --- | --- | --- | --- | --- | --- | --- | --- |
| 10 | 20 | 30 | 40 | 50 | Average |
| 2012 | 0.9 (CK) | 2.2b | 2.4b | 2.4c | 2.6b | 2.7b | 2.5 |
| 3 | 2.9a | 2.5b | 2.7bc | 2.5b | 3.2a | 2.8 |
| 4 | 2.6a | 2.9a | 3.3a | 3.0a | 3.1a | 3.0 |
| 4.5 | 2.7a | 2.6b | 2.9b | 2.9a | 3.3a | 2.9 |
| 5 | 2.3b | 2.4b | 2.2c | 2.6b | 3.0a | 2.5 |
| 5.5 | 2.1b | 2.4b | 2.4c | 2.5b | 2.8b | 2.4 |
| Average | 2.5 | 2.5 | 2.7 | 2.7 | 3.0 | 2.7 |
| 2013 | 0.9 (CK) | 1.9c | 2.4a | 2.0c | 2.4b | 2.5b | 2.2 |
| 3 | 2.3b | 2.6a | 2.3b | 2.5b | 2.7ab | 2.5 |
| 4 | 2.7a | 2.3ab | 2.6a | 2.9a | 2.9a | 2.7 |
| 4.5 | 2.0c | 2.3ab | 2.5a | 2.8a | 2.4b | 2.4 |
| 5 | 2.3b | 2.5a | 2.4ab | 2.3b | 2.3b | 2.4 |
| 5.5 | 2.0c | 2.1b | 1.8d | 2.0c | 2.3b | 2.0 |
| Average | 2.2 | 2.4 | 2.3 | 2.5 | 2.5 | 2.4 |
| 2014 | 0.9 (CK) | 1.8b | 1.8b | 2.3b | 2.2b | 2.0b | 2.0 |
| 3 | 2.2a | 2.3a | 2.3b | 2.4a | 2.2a | 2.3 |
| 4 | 2.3a | 2.2a | 2.7a | 2.5a | 2.4a | 2.4 |
| 4.5 | 2.0ab | 2.0ab | 2.2b | 2.2b | 2.3a | 2.1 |
| 5 | 1.8b | 2.0ab | 2.0c | 1.8c | 1.9b | 1.9 |
| 5.5 | 1.6c | 1.8b | 1.7d | 1.8c | 1.4c | 1.7 |
| Average | 2.0 | 2.0 | 2.2 | 2.2 | 2.0 | 2.1 |
